# Supplementary material for: Calcium phosphate nanoparticles primarily induce cell necrosis through lysosomal rupture: the origination of material cytotoxicity
Source: Royal Society of Chemistry journal article supplement (doi:10.1039/c4tb00056k), 2014-01-01
Supplement: c4tb00056k1.pdf [file c4tb00056k1.pdf]

# Calcium phosphate nanoparticles primarily induce cell necrosis through lysosomal rupture: the origination of material cytotoxicity

Zhaoming Liu,<sup>a</sup> Yun Xiao,<sup>a</sup> Wei Chen,<sup>a</sup> Yang Wang,<sup>a</sup> Ben Wang,<sup>a</sup> Guangchuan Wang,<sup>b</sup> Xurong Xu,<sup>b</sup> and Ruikang Tang<sup>\*a,b</sup>

<sup>a</sup> Centre for Biomaterials & Biopathways, Department of Chemistry, Zhejiang University, Hangzhou, Zhejiang 310027, China. Fax: +86-571-87953736; Tel: +86-571-87953736; E-mail: rtang@zju.edu.cn

<sup>b</sup> Qiushi Academy for Advanced Studies, Zhejiang University, Hangzhou, Zhejiang 310027, China.

## Supporting Information

**1. Characterization of calcium phosphate (CaP) nanoparticles (NPs):** The diameter of CaP NPs were sizes by dynamic light scattering (DLS) photometer (ZEN 3600, Malvern, England), 200  $\mu\text{L}$  140  $\mu\text{g/mL}$ , 300  $\mu\text{g/mL}$ , 360  $\mu\text{g/mL}$ , 440  $\mu\text{g/mL}$  CaP suspensions were dispersed in 1 mL ethanol with 10 min ultrasonic treatment. Then diluted the suspension for 300-fold in ethanol for measurement. 300  $\mu\text{g/mL}$  CaP suspension were washed twice and dispersed in ethanol, after that the samples were loaded on the silica specimen stubs and the energy dispersive X-ray spectroscopy (EDX) analyses was performed by SEM (S-4800, Hitachi, Japan). Other samples were used for XRD (X'Pert PRO, PANalytical B.V., Netherlands) and FT-IR (IRAffinity-1, Shimadzu, Japan) analyses.

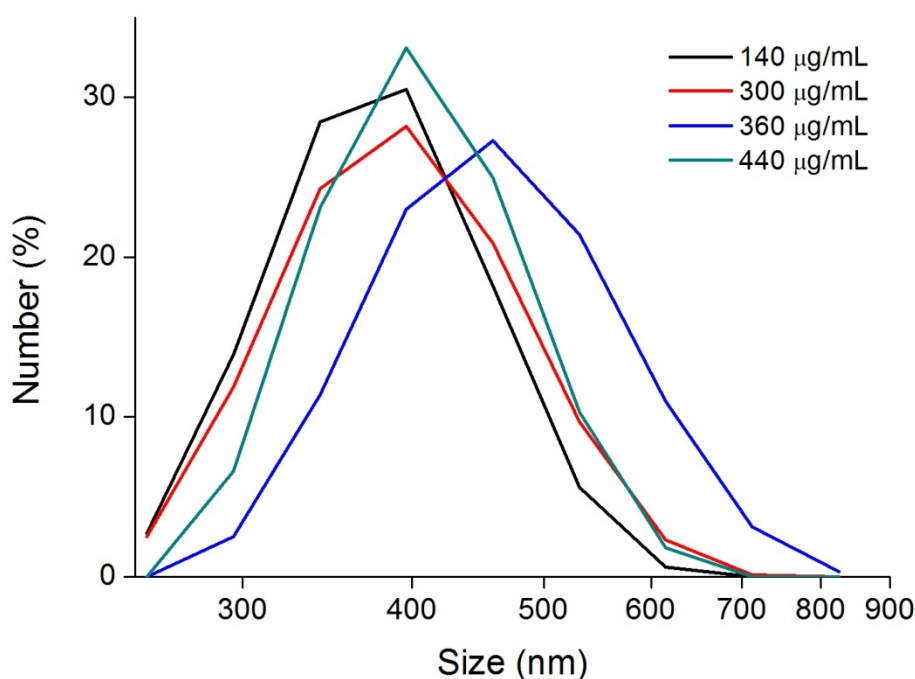

Fig. S1. Diameter of different concentrations of CaP suspension.

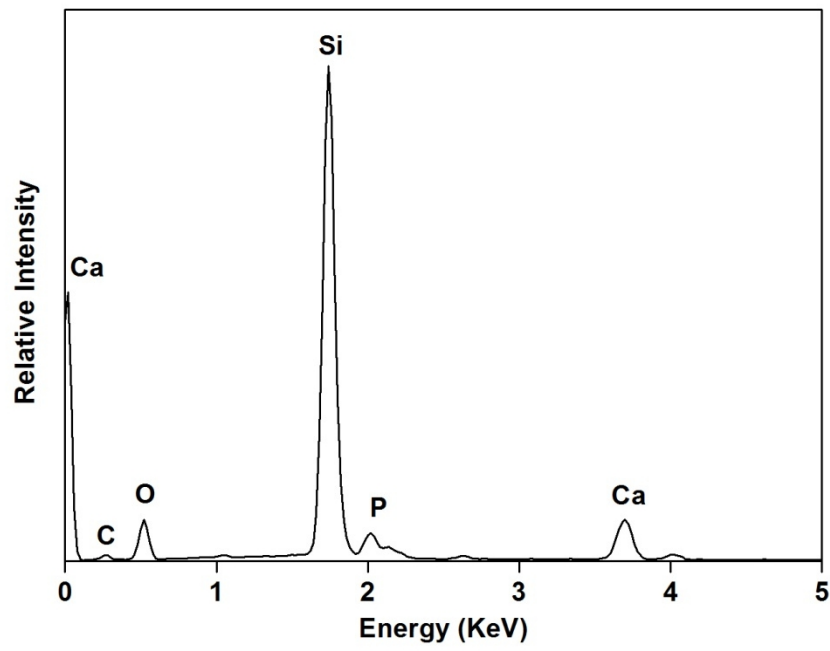

Fig. S2. EDX analyses of 300  $\mu\text{g/ml}$  CaP suspensions.

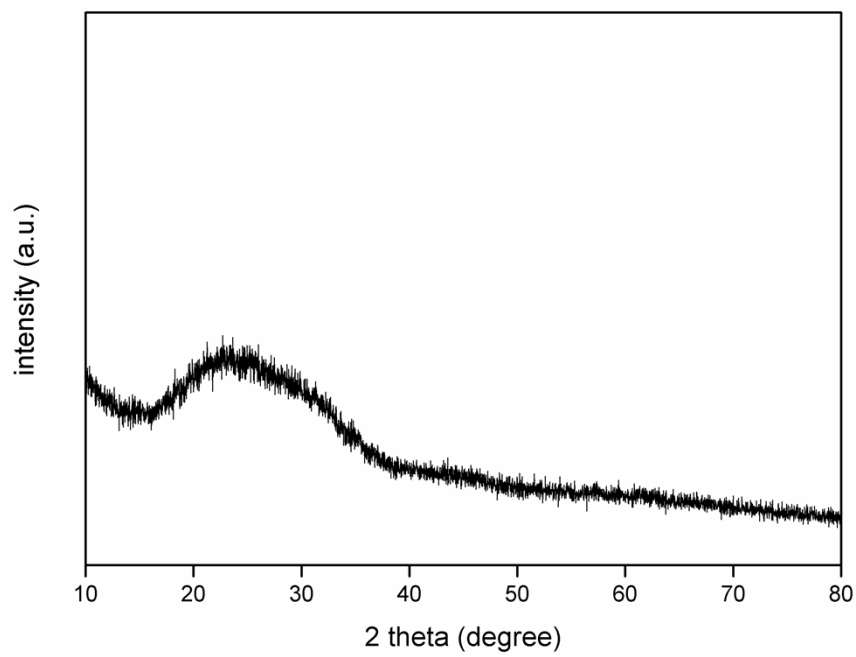

Fig. S3. XRD analyses of 300  $\mu\text{g/ml}$  CaP suspensions, which matches with the broad XRD patterns of amorphous calcium phosphate.<sup>1</sup>

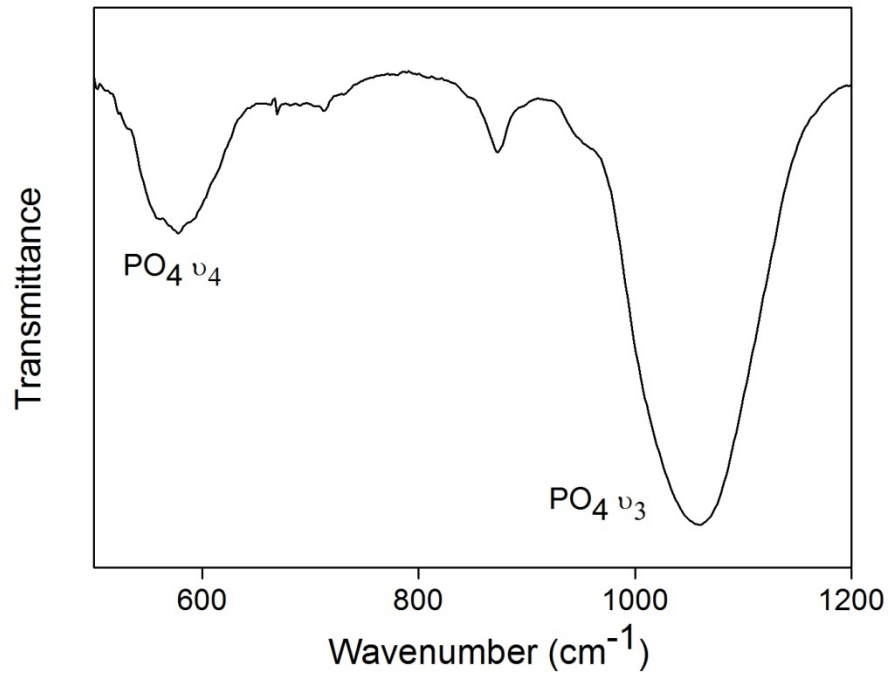

**Fig. S4.** IR analyses of 300 µg/ml CaP suspensions. The broad absorption bands at about 1055 cm<sup>-1</sup> presents for phosphate ν<sub>3</sub> vibrations and 570 cm<sup>-1</sup> presents for phosphate ν<sub>4</sub> bending. This spectrum matches with ACP phase.<sup>2</sup>

**Table S1.** Elemental analyses of 300  $\mu\text{g/ml}$  CaP suspensions.

| Elements | Weight Percent (%) | Atoms Percent (%) |
|----------|--------------------|-------------------|
| C        | 10.36              | 18.02             |
| O        | 30.85              | 40.27             |
| Si       | 47.15              | 35.06             |
| P        | 3.81               | 2.57              |
| Ca       | 7.82               | 4.07              |

**2. Stability of CaP NPs:** 20 mL of 300  $\mu\text{g/ml}$  CaP suspension were used and the pH was decreased by adding 1 M HCl and 3 ml suspension was taken at each pH. The optical density at 320 nm for CaP was measured with UV spectrophotometer (T6, Puxi, China) to test the solubility of CaP suspension in acidic solution.<sup>3</sup>

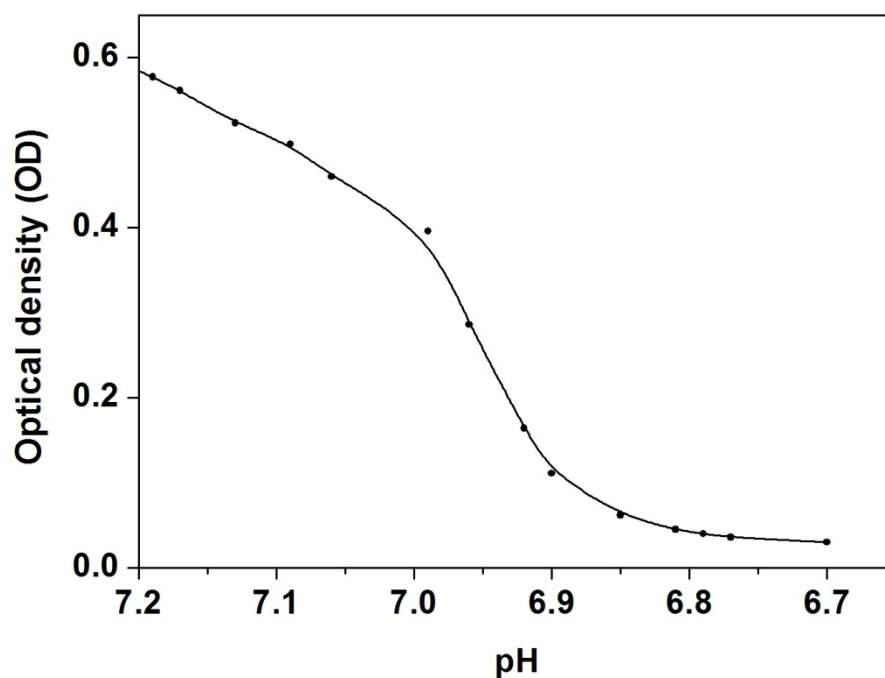

**Fig. S5.** Optical density of CaP against pH values. The Result indicates that CaP dissolve at slight acid environment.

**3. Treatment by using SiO<sub>2</sub> NPs:** The apoptotic and necrotic cells treated with 300 µg/ml CaP or SiO<sub>2</sub> suspensions separately were detected according to the instruction of Hoechst33342/PI apoptosis detection kit (Beyotime Institute of Biotechnology, China). 2.0×10<sup>5</sup> cells were seeded in 6 well plates per well, cultured for 18 h and mixed with different concentrations of CaP suspension for 4 h. Then the cells were stained with Hoechst33342 and PI and immediately observed with fluorescent microscope (TE2000-5, Nikon). Normal cells (Hoechst 33342 (-), PI (-)); Necrotic cells (Hoechst 33342 (+), PI (+)); Apoptotic cells (Hoechst 33342 (+), PI (-)).<sup>4</sup>

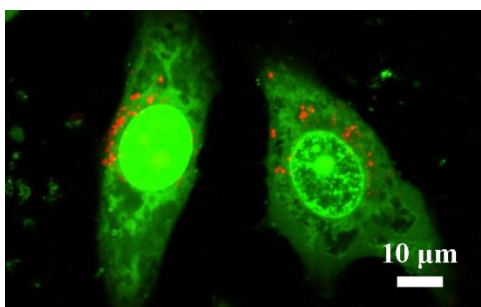

**Fig. S6.** 300 µg/ml SiO<sub>2</sub> suspension treated HepG2 stained by AO (bar = 10 µm). Red fluorescent presents for lysosomes, green fluorescent presents for cytoplasm and nucleolus. This figure exhibits an apoptotic process of HepG2.

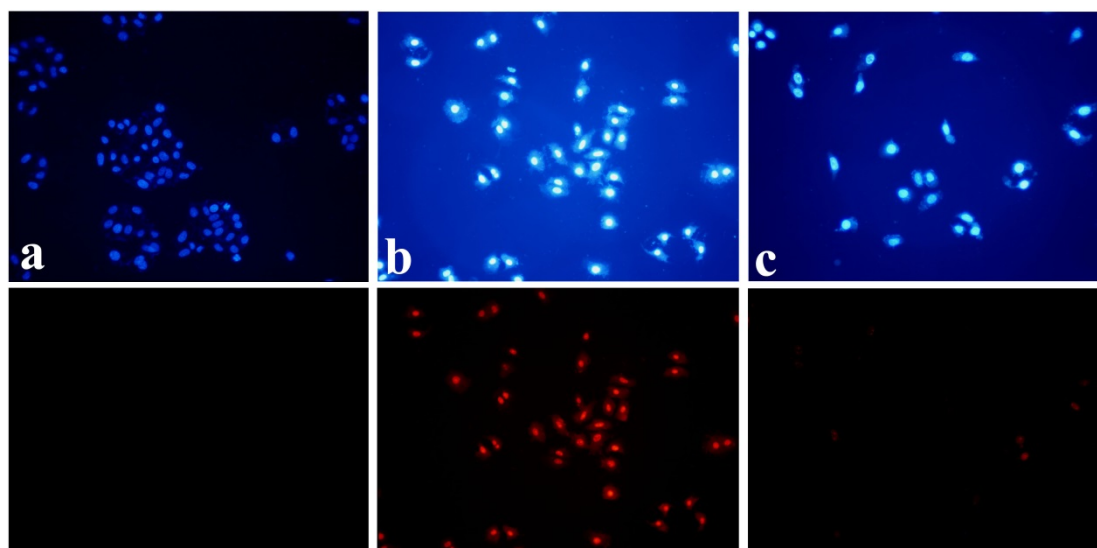

**Fig. S7.** Live cell imaging stained with Hoechst 33342/PI. Blue fluorescent presents for Hoechst 33342, red fluorescent presents for PI. (a) Normal cells. (Hoechst 33342 (-), PI (-)). (b) Cells treated with 300 µg/ml CaP suspensions exhibits necrotic process. (Hoechst 33342 (+), PI (+)). (c) Cells treated with 300 µg/ml SiO<sub>2</sub> suspension exhibits apoptotic process. (Hoechst 33342 (+), PI (-)).

**4. Changing of lysosomal pH and rupture:**  $1.0 \times 10^6$  HepG2 were incubated with 0.1 mg/mL FITC-dextran (40 kDa, Sigma, USA) for 3 days prior to the exposure to CaP NPs.  $1.0 \times 10^4$  HepG2 cells per well were cultured on cover glass for 18 h in the presence of 0.1 mg/mL FITC-dextran and then exposed to 140  $\mu\text{g/mL}$  CaP NPs for 0.5, 1.0, 1.5 and 2 h. Under the microscope, the green fluorescence intensity of FITC-dextran was measured by using the software of NIS-Element D (Nikon, Japan). The average fluorescence intensity = (total fluorescence intensity) / (number of cells). During the fluorescence intensity examination, each group contained at least 50 cells for the statistics. Since the lysosomal pH is proportionate to the fluorescent intensity,<sup>5</sup> the relative lysosomal pH could be estimated by the ratio of the average fluorescence intensity to that in control group.

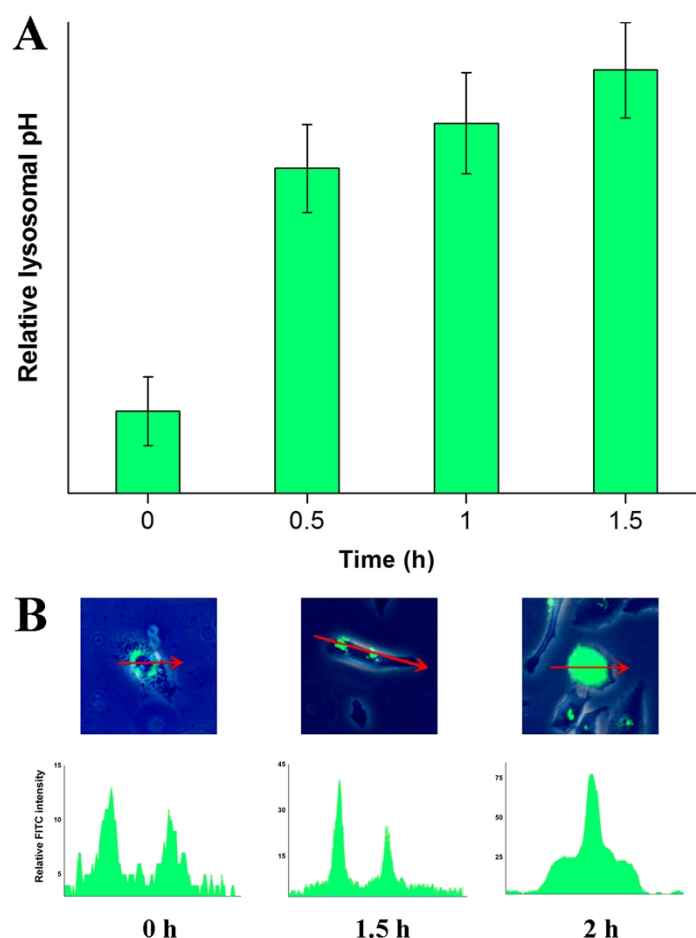

**Fig. S8.** HepG2 were incubated with 40 kDa FITC-dextran for lysosomal pH measurement and lysosomal rupture imaging. (A) Time dependent relative lysosomal pH. The results indicated that lysosomal pH increased after incubating with CaP NPs. (B) The fluorescence intensity and distribution of FITC-dextran at different incubation period with CaP NPs. FITC-dextran was distributed in cytoplasm with low fluorescence intensity at 0 h; the fluorescent intensity increased at 1.5 h, which was attributed to the CaP dissolution-induced pH increasing in lysosomes. After 2 h, the lysosomes disrupted so that FITC-dextran leaked to nucleus; moreover, the fluorescence intensity was further increased due to the enhanced fluorescence of fluorescein under non-acidic conditions.

## Reference

- [1] Eanes, E.; Gillessen, I.; Posner, A. *Nature* **1965**, *208*, 365.
- [2] Termine, J. D.; Posner, A. S. *Nature* **1966**, *211*, 268.
- [3] Tada, S.; Chowdhury, E. H.; Cho, C.-S.; Akaike, T. *Biomaterials* **2010**, *31*, 1453.
- [4] Jin, S.; Zhang, Q.; Kang, X.; Wang, J.; Zhao, W. *Ann. Oncol.* **2010**, *21*, 263.
- [5] M. S. Thibodeau, C. Giardina, D. A. Knecht, J. Helble and A. K. Hubbard, *Toxicol. Sci.* **2004**, *80*, 34-48.
